# Supplementary material for: Anab initiostudy on coinage atom-inserted cyanide/isocyanide: XMCN/XMNC (M = coinage atoms; X = halogen)
Source: Royal Society of Chemistry journal article supplement (doi:10.1039/c8ra00397a), 2018-01-01
Supplement: c8ra00397a1.pdf [file c8ra00397a1.pdf]

## Supporting Information

# An ab initio study on coinage atom-inserted cyanide/isocyanide: XMCN/XMNC (M = coinage atoms; X = halogen)

*Zhengguo Huang\**    *Xiaohong Wang*    *Jingbo Zhang\**    *Yuqing Li*

*Yuying Li*

Tianjin Key Laboratory of Structure and Performance for Functional Molecules; Key Laboratory of Inorganic-Organic Hybrid Functional Materials Chemistry (Tianjin Normal University), Ministry of Education; College of Chemistry, Tianjin Normal University, Tianjin 300387, People's Republic of China

---

\* Corresponding author. E-mail address: [hsxyhzhg@126.com](mailto:hsxyhzhg@126.com)

\* Corresponding author. E-mail address: [hxxyzjb@mail.tjnu.edu.cn](mailto:hxxyzjb@mail.tjnu.edu.cn)

**Table S1.** The selected vibrational frequencies of XMCN and XMNC (X = halogens, M = Ag and Au) and the concerning precursors calculated at the CCSD(T) level <sup>a</sup>.

|        | XMCN        |                     |             |             |        | XMNC        |                     |             |             |
|--------|-------------|---------------------|-------------|-------------|--------|-------------|---------------------|-------------|-------------|
|        | $\nu_{C-N}$ | $\Delta\nu_{C-N}^b$ | $\nu_{M-C}$ | $\nu_{X-M}$ |        | $\nu_{C-N}$ | $\Delta\nu_{C-N}^b$ | $\nu_{M-N}$ | $\nu_{X-M}$ |
| FAgCN  | 2338.6      | -29.2               | 428.7       | 582.7       | FAgNC  | 2115.2      | -76.7               | 441.9       | 577.3       |
| ClAgCN | 2188.4      | -75.2               | 412.6       | 304.7       | ClAgNC | 2102.6      | -34.8               | 435.8       | 265.5       |
| BrAgCN | 2193.6      | -47.0               | 403.3       | 164.8       | BrAgNC | 2113.1      | -6.6                | 425.1       | 165.4       |
| IAgCN  | 2196.4      | -24.0               | 395.8       | 136.5       | IAgNC  | 2124.7      | 12.1                | 415.4       | 143.9       |
| FAuCN  | 2310.1      | -57.7               | 461.5       | 576.8       | FAuNC  | 2132.8      | -59.1               | 484.4       | 595.5       |
| ClAuCN | 2430.1      | 166.6               | 463.9       | 337.5       | ClAuNC | 2115.3      | -22.1               | 475.4       | 559.2       |
| BrAuCN | 2235.7      | -4.9                | 451.2       | 208.4       | BrAuNC | 2086.4      | -33.2               | 469.7       | 239.8       |
| IAuCN  | 2218.3      | -2.1                | 444.1       | 156.5       | IAuNC  | 2116.1      | 3.4                 | 457.4       | 182.3       |
| FCN    | 2367.8      |                     |             |             | FNC    | 2191.9      |                     |             |             |
| ClCN   | 2263.6      |                     |             |             | ClNC   | 2137.4      |                     |             |             |
| BrCN   | 2240.6      |                     |             |             | BrNC   | 2119.7      |                     |             |             |
| ICN    | 2220.4      |                     |             |             | INC    | 2112.6      |                     |             |             |

<sup>a</sup> Frequencies are in  $\text{cm}^{-1}$  and intensities (in parentheses) are in  $\text{km}\cdot\text{mol}^{-1}$ .

<sup>b</sup>  $\Delta\nu_{C-N}$  is the difference of the  $\nu_{C-N}$  between XMCN (or XMNC) and XCN (or XNC).

**Table S2.** The AIM results of XAgCN and XAgNC (X = halogens) calculated using the CCSD(T) method with all-electron relativistic basis sets <sup>a</sup>.

| molecule | bond  | $\rho(r)$ | $\nabla^2\rho(r)$ | H(r)   | $ V(r) /G(r)$ | molecule | bond  | $\rho(r)$ | $\nabla^2\rho(r)$ | H(r)   | $ V(r) /G(r)$ |
|----------|-------|-----------|-------------------|--------|---------------|----------|-------|-----------|-------------------|--------|---------------|
| FAgCN    | F–Ag  | 0.128     | 0.693             | -0.045 | 1.207         | FAgNC    | F–Ag  | 0.132     | 0.698             | -0.049 | 1.220         |
|          | Ag–C  | 0.139     | 0.279             | -0.075 | 1.517         |          | Ag–N  | 0.129     | 0.533             | -0.052 | 1.280         |
|          | C–N   | 0.485     | 0.148             | -0.948 | 1.963         |          | C–N   | 0.460     | -0.193            | -0.882 | 2.058         |
| ClAgCN   | Cl–Ag | 0.097     | 0.256             | -0.031 | 1.330         | ClAgNC   | Cl–Ag | 0.093     | 0.365             | -0.028 | 1.233         |
|          | Ag–C  | 0.132     | 0.230             | -0.066 | 1.533         |          | Ag–N  | 0.120     | 0.525             | -0.041 | 1.236         |
|          | C–N   | 0.480     | 0.189             | -0.935 | 1.952         |          | C–N   | 0.466     | -0.254            | -0.901 | 2.076         |
| BrAgCN   | Br–Ag | 0.076     | 0.159             | -0.021 | 1.348         | BrAgNC   | Br–Ag | 0.081     | 0.138             | -0.026 | 1.428         |
|          | Ag–C  | 0.126     | 0.232             | -0.061 | 1.514         |          | Ag–N  | 0.115     | 0.453             | -0.041 | 1.264         |
|          | C–N   | 0.483     | 0.174             | -0.940 | 1.956         |          | C–N   | 0.460     | -0.184            | -0.882 | 2.055         |
| IAgCN    | I–Ag  | 0.055     | 0.142             | -0.011 | 1.230         | IAgNC    | I–Ag  | 0.061     | 0.151             | -0.013 | 1.259         |
|          | Ag–C  | 0.116     | 0.308             | -0.049 | 1.389         |          | Ag–N  | 0.110     | 0.491             | -0.033 | 1.214         |
|          | C–N   | 0.487     | 0.056             | -0.952 | 1.985         |          | C–N   | 0.468     | -0.232            | -0.906 | 2.068         |

<sup>a</sup> The recontracted scalar relativistic def2-TZVPP basis sets were used for all atoms.

**Table S3.** The AIM results of XAuCN and XAuNC (X = halogens) calculated using the CCSD(T) method with all-electron relativistic basis sets <sup>a</sup>.

| molecule | bond  | $\rho(r)$ | $\nabla^2\rho(r)$ | H(r)   | $ V(r) /G(r)$ | molecule | bond  | $\rho(r)$ | $\nabla^2\rho(r)$ | H(r)   | $ V(r) /G(r)$ |
|----------|-------|-----------|-------------------|--------|---------------|----------|-------|-----------|-------------------|--------|---------------|
| FAuCN    | F–Au  | 0.136     | 0.703             | -0.049 | 1.217         | FAuNC    | F–Au  | 0.140     | 0.720             | -0.052 | 1.226         |
|          | Au–C  | 0.163     | 0.278             | -0.095 | 1.578         |          | Au–N  | 0.150     | 0.580             | -0.066 | 1.311         |
|          | C–N   | 0.485     | 0.157             | -0.948 | 1.960         |          | C–N   | 0.454     | -0.077            | -0.863 | 2.023         |
| ClAuCN   | Cl–Au | 0.112     | 0.239             | -0.049 | 1.451         | ClAuNC   | Cl–Au | 0.135     | 0.288             | -0.065 | 1.475         |
|          | Au–C  | 0.156     | 0.265             | -0.088 | 1.569         |          | Au–N  | 0.157     | 0.550             | -0.070 | 1.337         |
|          | C–N   | 0.485     | 0.165             | -0.946 | 1.958         |          | C–N   | 0.449     | -0.186            | -0.855 | 2.058         |
| BrAuCN   | Br–Au | 0.107     | 0.176             | -0.047 | 1.515         | BrAuNC   | Br–Au | 0.117     | 0.153             | -0.057 | 1.599         |
|          | Au–C  | 0.161     | 0.252             | -0.092 | 1.593         |          | Au–N  | 0.147     | 0.564             | -0.062 | 1.306         |
|          | C–N   | 0.482     | 0.151             | -0.938 | 1.961         |          | C–N   | 0.452     | -0.132            | -0.859 | 2.040         |
| IAuCN    | I–Au  | 0.084     | 0.130             | -0.034 | 1.510         | IAuNC    | I–Au  | 0.094     | 0.130             | -0.042 | 1.562         |
|          | Au–C  | 0.153     | 0.260             | -0.083 | 1.562         |          | Au–N  | 0.143     | 0.526             | -0.057 | 1.303         |
|          | C–N   | 0.485     | 0.091             | -0.949 | 1.976         |          | C–N   | 0.459     | -0.140            | -0.879 | 2.041         |

<sup>a</sup> The recontracted scalar relativistic def2-TZVPP basis sets were used for all atoms.

**Table S4.** Charge decomposition analysis (CDA) results for XAgCN and XAgNC (X = F, Cl, Br and I) obtained using the MP2 level of theory.

|     | FAgCN   |         | ClAgCN  |         | BrAgCN  |         | IAgCN   |         |
|-----|---------|---------|---------|---------|---------|---------|---------|---------|
|     | F->Ag   | CN->Ag  | Cl->Ag  | CN->Ag  | Br->Ag  | CN->Ag  | I->Ag   | CN->Ag  |
| d   | 0.2168  | 0.3113  | 0.1227  | 0.2639  | 0.3079  | 0.2391  | 0.1511  | 0.2933  |
| b   | -0.0030 | 0.0179  | 0.0033  | 0.0083  | 0.0031  | 0.0130  | 0.0076  | 0.0093  |
| d-b | 0.2198  | 0.2934  | 0.1194  | 0.2556  | 0.3048  | 0.2261  | 0.1435  | 0.2840  |
| r   | -0.0650 | -0.0644 | -0.0866 | -0.1473 | -0.0321 | -0.0381 | -0.0573 | -0.1139 |
| b+d | 0.2138  | 0.3292  | 0.1259  | 0.2722  | 0.3111  | 0.2522  | 0.1587  | 0.3027  |

  

|     | FAgNC   |         | ClAgNC  |         | BrAgNC  |         | IAgNC   |         |
|-----|---------|---------|---------|---------|---------|---------|---------|---------|
|     | F->Ag   | NC->Ag  | Cl->Ag  | NC->Ag  | Br->Ag  | NC->Ag  | I->Ag   | NC->Ag  |
| d   | 0.2221  | 0.2420  | 0.3056  | 0.2049  | 0.3062  | 0.2109  | 0.1623  | 0.2169  |
| b   | -0.0021 | 0.0054  | 0.0015  | -0.0002 | 0.0048  | 0.0000  | 0.0092  | -0.0049 |
| d-b | 0.2242  | 0.2366  | 0.3041  | 0.2051  | 0.3014  | 0.2109  | 0.1532  | 0.2218  |
| r   | -0.0655 | -0.0819 | -0.0184 | -0.0610 | -0.0168 | -0.0610 | -0.0673 | -0.1190 |
| b+d | 0.2200  | 0.2474  | 0.3071  | 0.2047  | 0.3110  | 0.2109  | 0.1715  | 0.2119  |

**Table S5.** Charge decomposition analysis (CDA) results for XAuCN and XAuNC (X = F, Cl, Br and I) obtained using the MP2 level of theory.

|     | FAuCN   |         | ClAuCN  |         | BrAuCN  |         | IAuCN   |         |
|-----|---------|---------|---------|---------|---------|---------|---------|---------|
|     | F->Au   | CN->Au  | Cl->Au  | CN->Au  | Br->Au  | CN->Au  | I->Au   | CN->Au  |
| d   | 0.2116  | 0.1847  | 0.2929  | 0.1629  | 0.3021  | 0.1372  | 0.3474  | 0.1174  |
| b   | -0.0060 | 0.0133  | 0.0013  | 0.0122  | 0.0047  | -0.0058 | 0.0060  | -0.0088 |
| d-b | 0.2175  | 0.1714  | 0.2916  | 0.1507  | 0.2973  | 0.1431  | 0.3414  | 0.1262  |
| r   | -0.0693 | -0.1297 | -0.0651 | -0.1208 | -0.0442 | -0.1294 | -0.0404 | -0.1515 |
| b+d | 0.2056  | 0.1979  | 0.2941  | 0.1752  | 0.3068  | 0.1314  | 0.3534  | 0.1086  |

  

|     | FAuNC   |         | ClAuNC  |         | BrAuNC  |         | IAuNC   |         |
|-----|---------|---------|---------|---------|---------|---------|---------|---------|
|     | F->Au   | NC->Au  | Cl->Au  | NC->Au  | Br->Au  | NC->Au  | I->Au   | NC->Au  |
| d   | 0.2090  | 0.1790  | 0.3044  | 0.1587  | 0.2996  | 0.1150  | 0.3352  | 0.0762  |
| b   | -0.0050 | 0.0013  | 0.0034  | -0.0026 | 0.0093  | 0.0083  | 0.0101  | 0.0039  |
| d-b | 0.2140  | 0.1777  | 0.3010  | 0.1613  | 0.2903  | 0.1067  | 0.3250  | 0.0723  |
| r   | -0.0720 | -0.1223 | -0.0665 | -0.1104 | -0.0608 | -0.1349 | -0.0526 | -0.1804 |
| b+d | 0.2040  | 0.1804  | 0.3077  | 0.1561  | 0.3088  | 0.1233  | 0.3453  | 0.0800  |

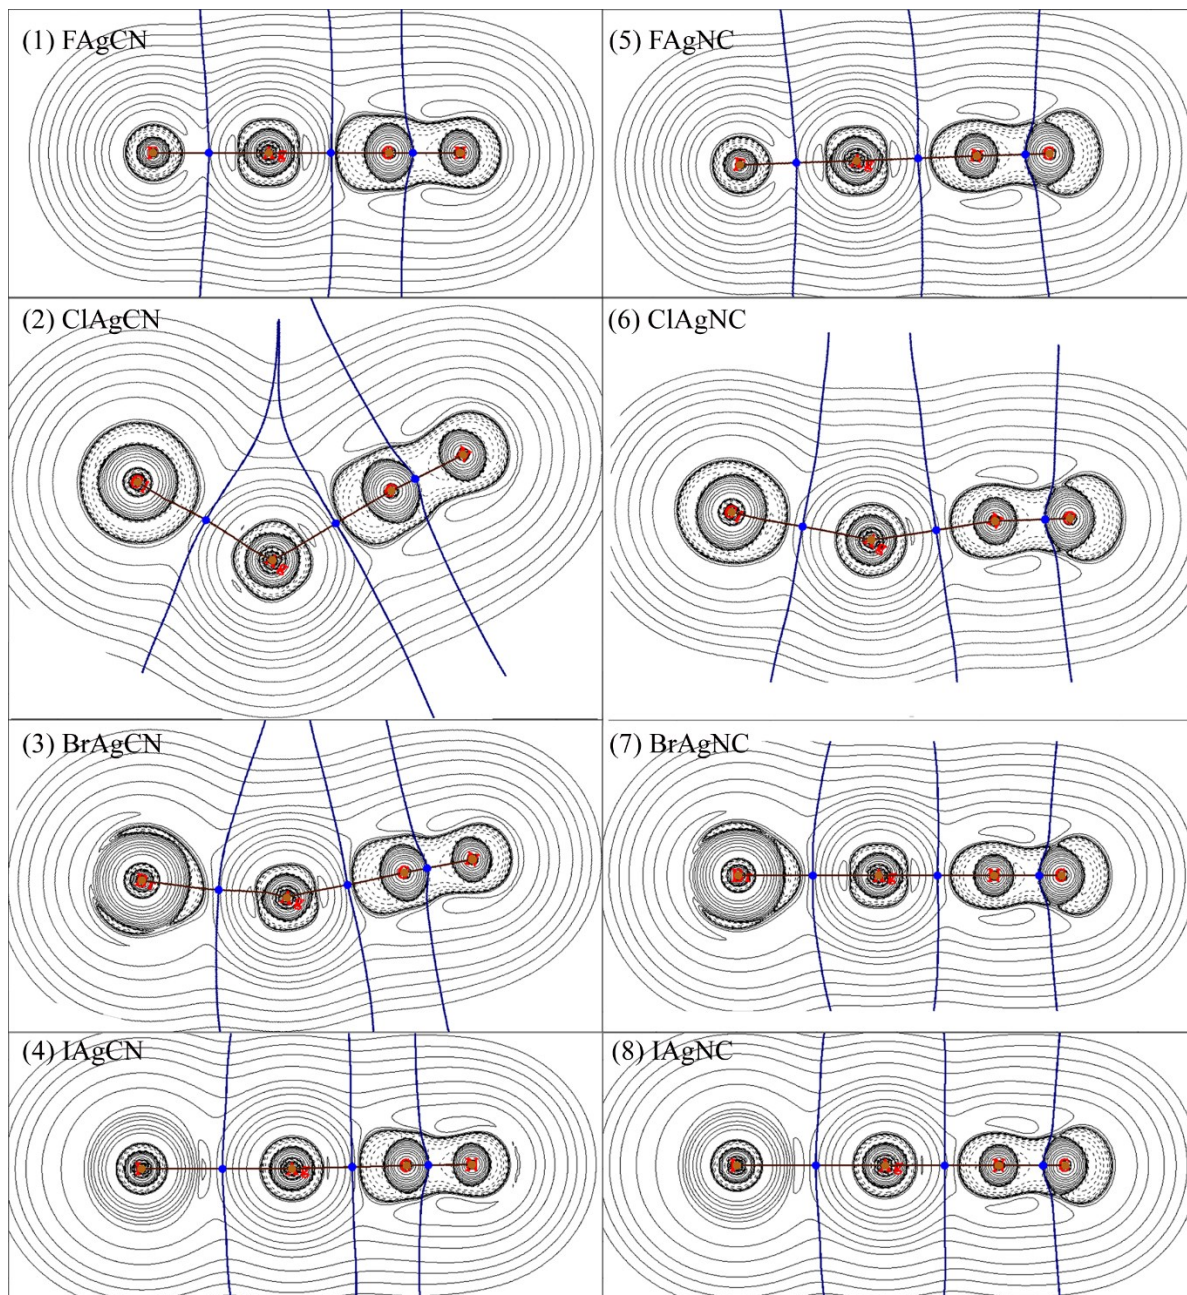

**Figure S1.** Contour line diagrams of  $\nabla^2\rho(r)$  for both XAgCN and XAgNC ( $X = \text{halogens}$ ), obtained by CCSD(T) method with all-electron relativistic basis sets. Dashed lines indicate areas of charge concentration ( $\nabla^2\rho(r) < 0$ ) while solid lines show areas of charge depletion ( $\nabla^2\rho(r) > 0$ ). The bold brown solid lines connecting the atomic nuclei are the bond paths and the solid blue lines separating the atomic nuclei indicate the zero-flux surfaces in the molecular plane. The crossing points of the bond paths and zero-flux surfaces are the bond critical points (BCP).

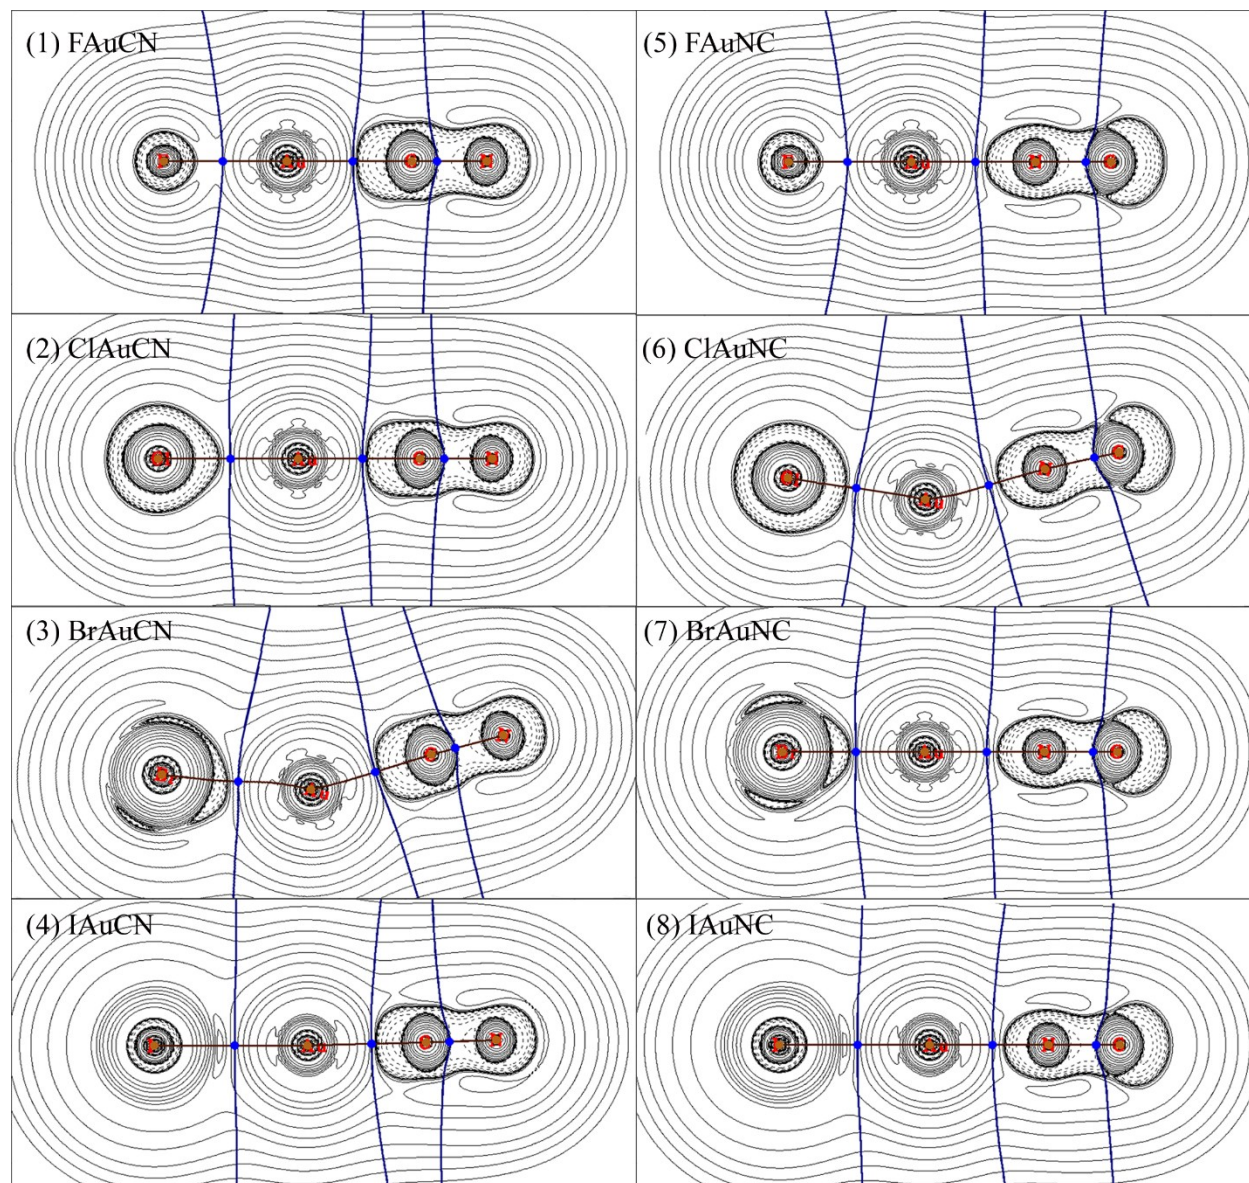

**Figure S2.** Contour line diagrams of  $\nabla^2\rho(r)$  for both XAuCN and XAuNC (X = halogens), obtained by CCSD(T) method with all-electron relativistic basis sets. Dashed lines indicate areas of charge concentration ( $\nabla^2\rho(r) < 0$ ) while solid lines show areas of charge depletion ( $\nabla^2\rho(r) > 0$ ). The bold brown solid lines connecting the atomic nuclei are the bond paths and the solid blue lines separating the atomic nuclei indicate the zero-flux surfaces in the molecular plane. The crossing points of the bond paths and zero-flux surfaces are the bond critical points (BCP).
